# Cell Adhesion and Shape Regulate TGF-Beta1-Induced Epithelial-Myofibroblast Transition via MRTF-A Signaling

Joseph W. O'Connor<sup>1</sup>, Esther W. Gomez<sup>1,2\*</sup>

<sup>1</sup> Department of Chemical Engineering, The Pennsylvania State University, University Park, Pennsylvania, United States of America, <sup>2</sup> Department of Bioengineering, The Pennsylvania State University, University Park, Pennsylvania, United States of America

## Abstract

Myofibroblasts, specialized cells that play important roles in wound healing and fibrosis, can develop from epithelial cells through an epithelial-mesenchymal transition (EMT). During EMT, epithelial cells detach from neighboring cells and acquire an elongated, mesenchymal-like morphology. These phenotypic changes are accompanied by changes in gene expression patterns including upregulation of a variety of cytoskeletal associated proteins which contribute to the ability of myofibroblasts to exert large contractile forces. Here, the relationship between cell shape and cytoskeletal tension and the expression of cytoskeletal proteins in transforming growth factor (TGF)- $\beta$ 1-induced EMT is determined. We find that culturing cells in conditions which permit cell spreading and increased contractility promotes the increased expression of myofibroblast markers and cytoskeletal associated proteins. In contrast, blocking cell spreading prevents transdifferentiation to the myofibroblast phenotype. Furthermore, we find that cell shape regulates the expression of cytoskeletal proteins by controlling the subcellular localization of myocardin related transcription factor (MRTF)-A. Pharmacological inhibition of cytoskeletal tension or MRTF-A signaling blocks the acquisition of a myofibroblast phenotype in spread cells while overexpression of MRTF-A promotes the expression of cytoskeletal proteins for all cell shapes. These data suggest that cell shape is a critical determinant of myofibroblast development from epithelial cells.

**Citation:** O'Connor JW, Gomez EW (2013) Cell Adhesion and Shape Regulate TGF-Beta1-Induced Epithelial-Myofibroblast Transition via MRTF-A Signaling. PLoS ONE 8(12): e83188. doi:10.1371/journal.pone.0083188

**Editor:** Adam J. Engler, University of California, San Diego, United States of America

**Received:** August 21, 2013; **Accepted:** November 10, 2013; **Published:** December 10, 2013

**Copyright:** © 2013 O'Connor, Gomez. This is an open-access article distributed under the terms of the Creative Commons Attribution License, which permits unrestricted use, distribution, and reproduction in any medium, provided the original author and source are credited.

**Funding:** Funding provided by The Pennsylvania State University. The funders had no role in study design, data collection and analysis, decision to publish, or preparation of the manuscript.

**Competing interests:** The authors have declared that no competing interests exist.

\* E-mail: ewgomez@engr.psu.edu

## Introduction

Myofibroblasts, specialized cells within the body that exert large contractile forces, mediate wound healing and upon aberrant activation contribute to the development of fibrosis and cancer [1–4]. The contractility of these cells is governed by specialized matrix adhesions [5] and distinct cytoskeletal organization characterized by contractile bundles of actin and myosin [6]. A hallmark of the myofibroblast phenotype is the expression of alpha smooth muscle actin ( $\alpha$ SMA), a cytoskeletal protein which promotes increased force production enabling myofibroblasts to close wound sites or to induce tissue contracture during disease. Elucidation of the factors that regulate the evolution and function of myofibroblasts may thus be useful for identification of therapeutic approaches to counteract the development of pathological conditions mediated by myofibroblasts.

Epithelial cells, if presented with appropriate cues, can transition to a myofibroblast phenotype through an epithelial-mesenchymal transition (EMT). Transforming growth factor

(TGF)- $\beta$ 1, a potent inducer of EMT, promotes the loss of epithelial features, including apico-basal polarity and intercellular contacts, and the gain of mesenchymal properties including increased migratory capacity and contractility. Furthermore, during EMT cells exhibit dramatic morphological changes. These phenotypic changes are accompanied by changes in gene expression patterns including reduced expression of epithelial markers such as E-cadherin and cytokeratins and upregulation of mesenchymal markers including vimentin [7]. Further progression of EMT can lead to the induction of a myogenic program and the *de novo* expression of  $\alpha$ SMA resulting in the development of myofibroblasts [8].

Adhesion to extracellular matrix (ECM) controls cell morphology and adhesion to some ECM components can regulate EMT [9–12]. Indeed, in some experimental systems cell morphological changes induce features of EMT [13,14]. Cell morphology can also be modulated by physical properties of the microenvironment including matrix rigidity [15]. Biophysical cues are implicated in the regulation of TGF $\beta$ 1-

induced EMT as rigid matrices promote EMT and compliant matrices block EMT in mammary, kidney, and lung epithelial cells [9,16]. A recent study demonstrated that micropatterned epithelial cells exhibit high expression levels of cytokeratins across a range of cell spread areas and that TGF $\beta$ 1 treatment induces downregulation of cytokeratins and upregulation of vimentin across the same range of cell spread areas [17]. However, it is not clear whether TGF $\beta$  signaling and cell shape together regulate the induction of myogenic and cytoskeletal regulatory proteins during the development of myofibroblasts from epithelial cells.

Serum response factor (SRF) regulates the transcription of genes associated with adhesion and differentiation [18–20] and has been implicated in the control of the myofibroblast phenotype [21,22]. The transcriptional activity of SRF is regulated by a variety of cofactors, including the myocardin-related transcription factor (MRTF) family members MRTF-A and -B (also known as MAL, BSAC, and MKL1/2) [20]. The subcellular localization and activity of MRTFs are in part controlled by their association with monomeric actin (G-actin). Shifts in actin polymerization induce dissociation of MRTFs from G-actin thus allowing for MRTFs to localize to the cell nucleus to interact with SRF to promote gene expression. MRTFs play an important role in regulating a variety of cell fates and behaviors including EMT [21,23–26], experimental metastasis [27], and myofibroblast activation in response to myocardial infarction [28]. Previous studies have found that the nuclear localization of MRTF-A is sensitive to endogenous and exogenous forces [24,29–32]. Cell shape can modulate cytoskeletal tension, thus, MRTF signaling during TGF $\beta$ 1-induced EMT may be promoted by changes in cellular morphology that characterize the progression of EMT.

In this study, we sought to determine whether the expression of cytoskeletal genes induced in epithelial cells by TGF $\beta$ 1 depends on cell adhesion and cell shape. Epithelial cells exhibit increased cell spreading upon TGF $\beta$ 1-induced EMT. Increased cellular tension is thought to be necessary for the development of myofibroblasts [33,34]; thus, we hypothesized that changes in cell spreading may be necessary for the increased expression of cytoskeletal proteins and the development of myofibroblasts from epithelial cells. We found that mammary epithelial cells that were cultured in conditions that permitted cell spreading exhibited increased expression of  $\alpha$ SMA, caldesmon, and tropomyosin while limiting cell adhesion abrogated upregulation of the myofibroblast program. We identify MRTF-A as a key determinant in the cell shape-dependent control of cytoskeletal and myofibroblast-specific gene expression during TGF $\beta$ 1-induced EMT. These results suggest that cell adhesion and shape in combination with MRTF-A signaling play an important role in the regulation of TGF $\beta$ 1-induced myofibroblast transdifferentiation from epithelial cells.

## Materials and Methods

### Cell culture and reagents

NMuMG cells were obtained from American Type Culture Collection (ATCC CRL-1636) and were cultured in DMEM

supplemented with 10% fetal bovine serum (Atlanta Biologicals), 10  $\mu$ g/ml insulin (Sigma), and 50  $\mu$ g/ml gentamicin (Life Technologies). Cells were serum starved overnight and then treated with 10 ng/ml recombinant human TGF $\beta$ 1 (R&D Systems) or carrier solution for 48 h. For inhibitor studies, cells were treated with: Blebbistatin (10  $\mu$ M, Sigma); Y-27632 (10  $\mu$ M, Tocris); CCG-1423 (7.5  $\mu$ M, Enzo). For MRTF-A localization studies, cells were treated with TGF $\beta$ 1 as described followed by leptomycin B (1 ng/ml, Enzo), a nuclear export inhibitor, for 1 h prior to cell fixation.

### Fabrication of micropatterned substrata

Microfabricated substrata were created using a modified microcontact printing stamp-off procedure [35,36]. Briefly, poly(dimethylsiloxane) (PDMS; Dow Corning Corporation) stamps were cast from master silicon molds generated by photolithography. The PDMS stamps and PDMS-coated glass coverslips were UV-oxidized for 7 minutes. Featureless PDMS slabs were coated with 25  $\mu$ g/ml fibronectin (BD Biosciences) for 2 h, rinsed with 1 $\times$  phosphate buffered saline (PBS), dried thoroughly with nitrogen, and then brought into conformal contact with the template stamp to remove fibronectin from the PDMS slab. PDMS-coated glass coverslips were then stamped with fibronectin from the PDMS slab and blocked with 1% Pluronic F127 (Sigma) for 30 min. Coverslips were rinsed with PBS and then seeded with cells. Finally, samples were rinsed after 15 min to remove non-adherent cells.

### Plasmids and transfections

Human FLAG-tagged MRTF-A (p3xFLAG-MRTF-A) [37], MRTF-A- $\Delta$ N, and the p3xFLAG-CMV-7.1 vector with a subcloned YFP were obtained from Celeste Nelson (Princeton University) [24]. MRTF-A- $\Delta$ C was generated using a QuikChange II XL Site-Directed Mutagenesis Kit (Agilent Technologies) to remove 903 bp from the carboxyl terminus of MRTF-A [37]. Cells were transfected with plasmids using Lipofectamine LTX with Plus Reagent (Life Technologies) following the manufacturer's protocol.

### Immunofluorescence staining

For staining of  $\alpha$ SMA, samples were fixed with 1:1 methanol/acetone at -20  $^{\circ}$ C for 10 min. For all other stains, samples were rinsed with PBS and then fixed with 4% paraformaldehyde at room temperature for 15 min. Following fixation, samples were rinsed with PBS, permeabilized with 0.1% Triton X-100, blocked with 10% goat serum (Sigma), and incubated with the following primary antibodies:  $\alpha$ SMA (1A4, Sigma), tropomyosin (TM311, Sigma), caldesmon (E89, Abcam), pSmad3 (D12E11, Cell Signaling), and MRTF-A (H140, Santa Cruz Biotechnology). Samples were then rinsed with PBS and incubated with Alexa Fluor-conjugated secondary antibodies (Life Technologies). Nuclei were counterstained with Hoechst 33342 (Life Technologies). pSmad3 staining was performed following a 1 h treatment with TGF $\beta$ 1. For staining of filamentous actin, samples were fixed with 4% paraformaldehyde and then incubated with Alexa Fluor 594 phalloidin (Life Technologies). All samples were mounted on

glass coverslides using Fluormount-G (Electron Microscopy Sciences).

### Western blotting

NMuMG cells were lysed in ice cold RIPA buffer with protease and phosphatase inhibitors (Pierce). Equal amounts of lysate were separated on a 10% tris-glycine gel (Life Technologies) and transferred to a PVDF membrane. Membranes were blocked with 5% non-fat dry milk and analysis was performed with primary antibodies against  $\alpha$ SMA (1:2500; Sigma), caldesmon (1:10000; Abcam), tropomyosin (1:700; Sigma), vimentin (1:500; Sigma), E-cadherin (1:1000; Cell Signaling),  $\alpha$ -tubulin (1:1000, Sigma), and  $\beta$ Actin (1:1000; Cell Signaling). HRP-conjugated secondary antibodies (1:2000; Cell Signaling) and SuperSignal West Pico Chemiluminescent Substrate (Pierce) were used for detection. Blots were imaged using a FluorChem FC2 system (Cell Biosciences). Densitometric analysis was performed using ImageJ software.

### Quantitative real-time PCR

Total RNA was isolated from cells using a RNeasy Plus kit (Qiagen) followed by cDNA synthesis using a High Capacity cDNA Reverse Transcription Kit (Applied Biosystems). Transcript levels were measured using Taqman assays (Life Technologies) on an Applied Biosystems 7300 Real-time PCR System. For each sample, melt curve analysis was performed to ensure a single PCR product and mRNA expression was normalized to the expression of cyclophilin.

### Microscopy and analysis

Samples were imaged using a 40 $\times$  air objective on a Nikon Eclipse Ti-E inverted fluorescence microscope equipped with a Photometrics CoolSNAP HQ<sup>2</sup> CCD camera or with an Olympus FV1000 confocal microscope. Cell area, aspect ratio, and integrated fluorescence intensity were measured using ImageJ software. For scoring of protein expression, at least 50 cells were analyzed per condition. Relative levels were computed with respect to 400  $\mu$ m<sup>2</sup> control samples for varying spread area or with respect to shape factor 1 control samples for varying cell aspect ratio. MRTF-A subcellular localization was determined by comparing the nuclear and cytoplasmic fluorescence intensities within cells. Cells showing a mean nuclear intensity that was two-fold greater than the mean cytoplasmic intensity were classified as exhibiting nuclear localized MRTF-A.

Samples were compared by either a student t-test or by ANOVA followed by the Bonferroni correction for multiple comparisons using Kaleidagraph 4.1 software. Differences were considered significant for  $p < 0.05$ . A minimum of three independent experiments were performed for all studies. All reported values are mean  $\pm$  standard error of the mean.

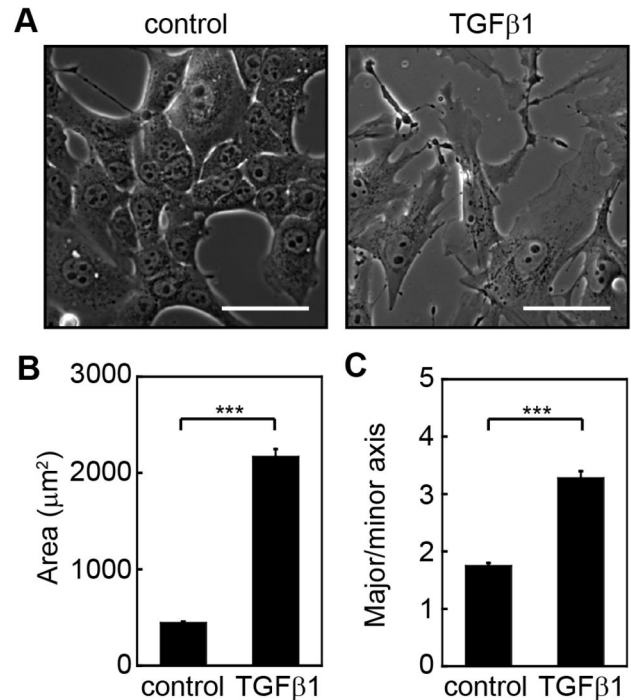

**Figure 1. TGFβ1-induced EMT correlates with increased cell spreading and elongation.** (A) Phase contrast images of NMuMG cells treated with and without TGFβ1. Quantification of (B) projected cell area and (C) cell elongation for NMuMG cells treated with and without TGFβ1. \*\*\* $p < 0.001$ .  $n > 150$  cells. Scale bars, 50  $\mu$ m.

doi: 10.1371/journal.pone.0083188.g001

## Results

### Cell spreading is necessary for TGFβ1-induced expression of myofibroblast markers

Induction of EMT by TGFβ1 results in significant changes in cell morphology with epithelial cells transitioning from a cuboidal, cobblestone morphology to an elongated, fibroblast-like shape (Figure 1A). Quantification of these cell shape changes reveal increased cell spreading on the underlying substratum and increased cell aspect ratio (Figure 1B,C). These morphological changes are accompanied by reduced expression of the epithelial marker E-cadherin and increased expression of the mesenchymal marker vimentin (Figure 2A and Figure S1). Likewise, TGFβ1 induces increased expression of myofibroblast markers and cytoskeletal associated proteins including  $\alpha$ SMA, caldesmon, and tropomyosin (Figure 2). These proteins mediate assembly and stability of filamentous actin and cellular contractility [5,38,39].

To determine whether TGFβ1-induced increases in cell spread area and cell aspect ratio are required for the upregulation of cytoskeletal associated proteins we employed a microcontact printing approach in order to precisely control the size and shape of individual cells. NMuMG cells were seeded onto square islands of fibronectin of varying sizes ranging from 400  $\mu$ m<sup>2</sup> to 2500  $\mu$ m<sup>2</sup> in area. These sizes encompass the

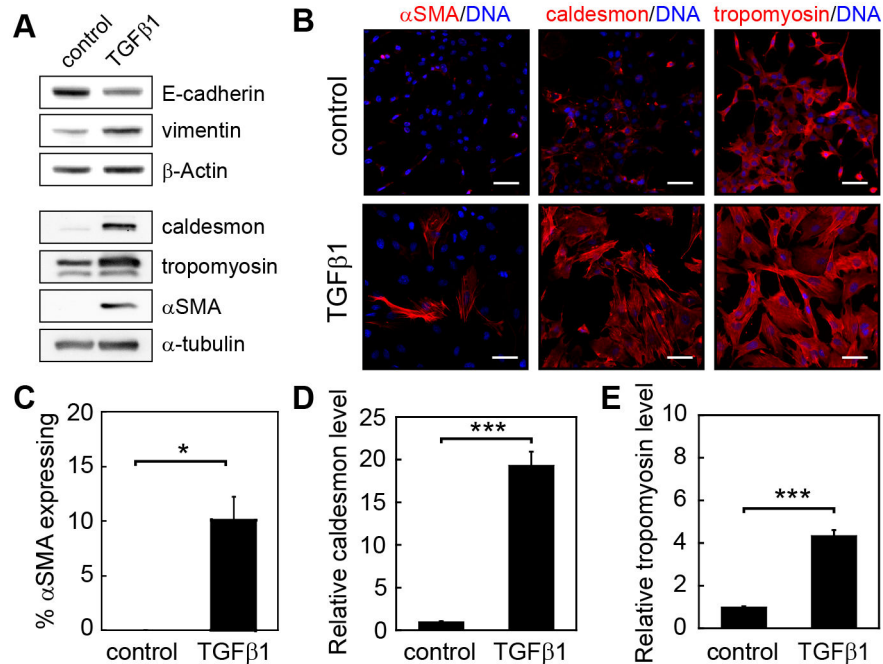

**Figure 2. TGFβ1 induces the expression of myofibroblast markers and cytoskeletal associated proteins in NMuMG cells.** (A) Western blot for EMT markers and cytoskeletal associated proteins in NMuMG cells after 48 h treatment with or without TGFβ1. (B) Immunofluorescence staining for αSMA, caldesmon, and tropomyosin in control and TGFβ1-treated samples. Quantification of the percentage of cells expressing (C) αSMA and the relative levels of (D) caldesmon and (E) tropomyosin expression in control and TGFβ1-treated samples. Relative levels are computed in comparison to control samples. \* $p < 0.05$ , \*\*\* $p < 0.001$ . Scale bars, 50  $\mu\text{m}$ .

doi: 10.1371/journal.pone.0083188.g002

range of cell spread areas exhibited by NMuMG cells on fibronectin before and after induction of EMT by TGFβ1 (Figure 1). Cells were cultured on the microfabricated substrata for 48 h in the presence or absence of TGFβ1. Cells cultured on 2500  $\mu\text{m}^2$  islands, which permitted cell spreading, exhibited increased expression of αSMA in the presence of TGFβ1 in comparison to control cells. In contrast, cells cultured on 400  $\mu\text{m}^2$  islands were unable to spread appreciably and did not increase expression of αSMA (Figure 3). The expression of caldesmon and tropomyosin increased moderately as a function of cell spread area in control cells, and this effect was enhanced by treatment with TGFβ1 (Figure 3C,D). These data indicate that TGFβ1 induces the expression of myofibroblast markers and cytoskeletal associated proteins preferentially in spread cells, suggesting that increased adhesion and cell spreading are key determinants in the transdifferentiation of myofibroblasts from epithelial cells.

Since changes in cell shape regulate cellular differentiation in other contexts [32,40], we sought to decouple this factor from cell spread area to directly probe the role of cell shape in the regulation of TGFβ1-induced cytoskeletal protein expression. To this end, we generated substrata with microcontact printed protein islands with a constant area of 1600  $\mu\text{m}^2$  and varying shape factor. Here, shape factor is defined as the ratio of the major axis to the minor axis of the printed protein island. An increase in shape factor from a square to a rectangle mimics

the cell shape changes exhibited by epithelial cells during EMT as they transition to an elongated, fibroblastoid morphology following treatment with TGFβ1 (Figure 1A, C). The percentage of cells expressing αSMA was significantly higher for cells cultured on microfabricated substrata with a shape factor of 8 compared to a shape factor of 1 (Figure 4). Similarly, the expression level of caldesmon and tropomyosin increased with increasing shape factor (Figure S2). These results demonstrate a role for cell shape in the regulation of TGFβ1-induced expression of myogenic markers and actin binding proteins in epithelial cells.

In the TGFβ1 canonical signaling pathway, TGFβ ligands bind to receptors displayed on the cell surface which stimulate phosphorylation and subsequent nuclear translocation of Smad proteins [41]. The observed increase in the levels of myofibroblast markers as a function of cell shape could thus be a result of differences in the activation of the TGFβ1 canonical signaling pathway. Immunofluorescence analysis revealed that pSmad3 localized to the cell nucleus in all cells treated with TGFβ1 regardless of cell spread area (Figure S3), suggesting that activation of Smad signaling is not disrupted by restricting cell spreading. Therefore, the observed increase in the expression of myofibroblast markers as a function of cell shape is likely regulated by other signaling mechanisms.

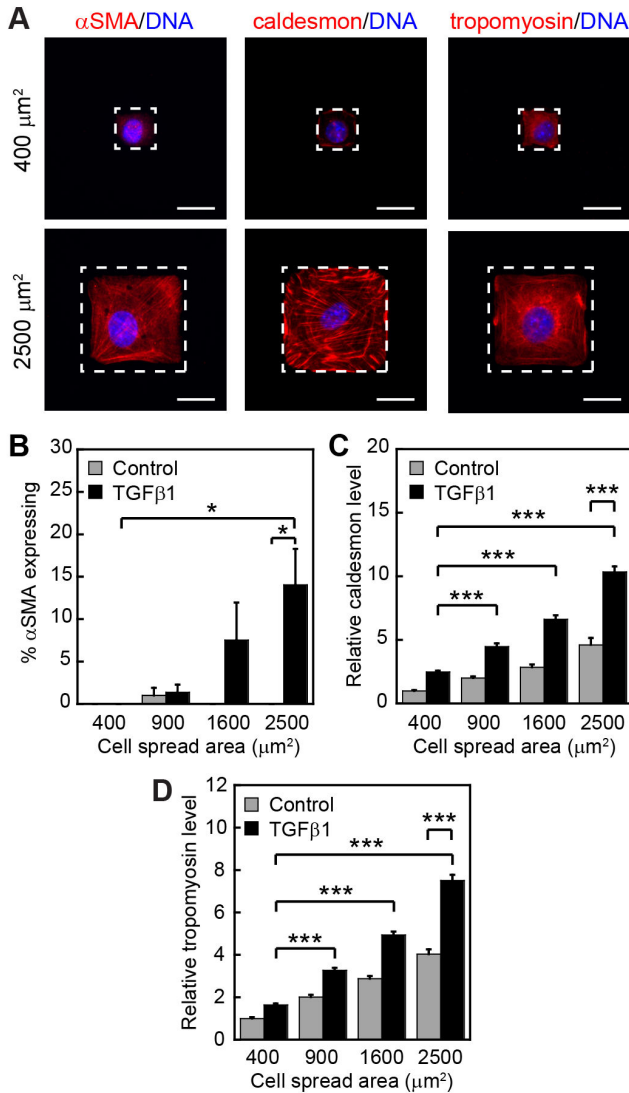

**Figure 3. Cell spreading promotes TGFβ1-induced expression of actin binding proteins and myofibroblast markers.** (A) Immunofluorescence staining of αSMA, caldesmon, and tropomyosin for TGFβ1-treated cells cultured on 400 μm<sup>2</sup> and 2500 μm<sup>2</sup> squares. Stamped protein islands are outlined by a white dotted line. (B) Frequency of squares with αSMA expression after treatment with and without TGFβ1. Relative levels of (C) caldesmon and (D) tropomyosin with and without TGFβ1. Relative levels are computed in comparison to 400 μm<sup>2</sup> control samples. \*p < 0.05; \*\*\*p < 0.001. Scale bars, 20 μm.

doi: 10.1371/journal.pone.0083188.g003

**Expression of myofibroblast markers requires increases in intracellular tension**

During TGFβ1-induced EMT cells exhibit dramatic cytoskeletal reorganization that is mediated by signaling through the Rho GTPase pathway [42]. To elucidate whether the organization of the actin cytoskeleton contributes to cell

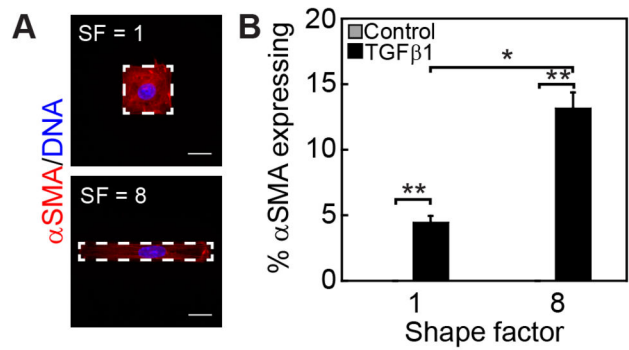

**Figure 4. Cell shape regulates TGFβ1-induced expression of αSMA.** (A) Immunofluorescence staining of αSMA for TGFβ1-treated NMuMG cells on 1600 μm<sup>2</sup> islands with shape factors 1 and 8. (B) Quantification of the percentage of NMuMG cells expressing αSMA on islands with shape factors 1 and 8 after a 48 h treatment with or without TGFβ1. \*p < 0.05, \*\*p < 0.01. Scale bars, 20 μm.

doi: 10.1371/journal.pone.0083188.g004

shape control of TGFβ1-induced EMT the actin cytoskeleton was visualized using fluorescently labeled phalloidin, a molecule which selectively binds to actin filaments [43]. Control and TGFβ1 treated cells cultured on 2500 μm<sup>2</sup> islands exhibited actin filaments (F-actin) while restricting cell adhesion by culturing cells on smaller islands blocked substantial actin filament assembly (Figure 5A). Quantification of phalloidin fluorescence revealed that levels of F-actin increased with an increase in cell adhesion and spreading for both control and TGFβ1 treated cells (Figure 5B). These results are consistent with previous studies which found that cells with increased cell spreading contain increased filamentous actin and higher levels of cytoskeletal tension [44,45]. An increase in F-actin levels was not observed for cells upon treatment with TGFβ1 in comparison to control cells of the same spread area at 48 h following treatment with TGFβ1. Similarly, levels of F-actin increased for cells cultured on microfabricated substrata with a shape factor of 8 compared to a shape factor of 1 for TGFβ1 treated and control cells (Figure 5C). Decreasing contractile tension by treatment with the non-muscle myosin ATPase inhibitor blebbistatin or the ROCK inhibitor Y27632 reduced the percentage of cells expressing αSMA on 2500 μm<sup>2</sup> islands in the presence of TGFβ1 (Figure 5D). These data support previous findings demonstrating that signaling through RhoA/ROCK mediates TGFβ1-induced actin cytoskeletal rearrangements and is necessary for induction of EMT [42]. Moreover, our results suggest that the differential organization of the actin cytoskeleton and increases in cellular tension may play an important role in mediating control of the expression of myofibroblast markers by cell shape.

**Cell shape controls the expression of myofibroblast markers by governing the subcellular localization of MRTF-A**

Recent studies have linked cell adhesion and actin dynamics to the serum response factor (SRF) signaling pathway

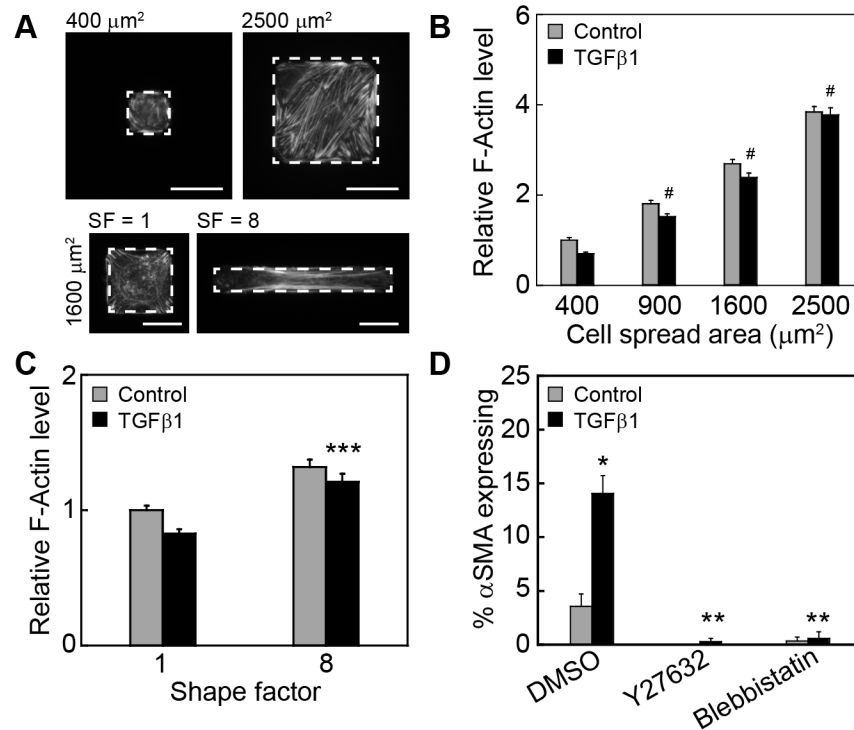

**Figure 5. Cell shape regulates the organization of the actin cytoskeleton in NMuMG cells.** (A) Fluorescence staining for F-actin in TGF $\beta$ 1-treated NMuMG cells cultured on 400  $\mu\text{m}^2$  and 2500  $\mu\text{m}^2$  squares and on 1600  $\mu\text{m}^2$  islands with shape factor 1 and 8. Quantification of the relative total integrated intensity of phalloidin in NMuMG cells of (B) varying area ( $\#p < 0.001$  in comparison to 400  $\mu\text{m}^2$ , TGF $\beta$ 1 treatment) and (C) shape factor ( $***p < 0.001$  in comparison to SF1, TGF $\beta$ 1 treatment). (D) Percentage of cells cultured on 2500  $\mu\text{m}^2$  squares that express  $\alpha$ SMA after simultaneous treatment with TGF $\beta$ 1 and contractility inhibitors ( $*p < 0.05$  in comparison to DMSO control;  $**p < 0.01$  in comparison to DMSO TGF $\beta$ 1). Scale bars, 25  $\mu\text{m}$ .

doi: 10.1371/journal.pone.0083188.g005

[32,46–48]. A subset of SRF target genes is regulated by Rho-actin signaling and by shifts in the polymerization of actin [18]. Myocardin related transcription factors (MRTF)-A and -B, cofactors of SRF, mediate this effect [46]. Notably, MRTF-A regulates the transcription of  $\alpha$ SMA [49], a key marker of the myofibroblast phenotype. Thus, we hypothesized that MRTF-A signaling might be involved in cell shape-dependent transdifferentiation of myofibroblasts from epithelial cells. MRTF-A was observed to localize to the nucleus in control and TGF $\beta$ 1-treated cells that were permitted to spread, however, restricting cell spreading reduced the percentage of cells that exhibited MRTF-A nuclear localization (Figure 6A,B). The increase in MRTF-A nuclear localization in cells cultured on large islands in comparison to small islands correlates with observed increases in F-actin and in expression of  $\alpha$ SMA, caldesmon, and tropomyosin in TGF $\beta$ 1-treated cells. Treatment with CCG-1423, an inhibitor that blocks the interaction between SRF and MRTF-A [50], decreased the percentage of TGF $\beta$ 1 treated cells that expressed  $\alpha$ SMA (Figure 6C). Likewise, CCG-1423 blocked the increased expression of caldesmon and tropomyosin in TGF $\beta$ 1 treated cells (Figure S4). These data suggest that cell adhesion and shape control TGF $\beta$ 1-induced expression of myofibroblast markers by cooperating with SRF/

MRTF-A signaling and by regulating the nuclear localization of MRTF-A.

Overexpression of MRTF-A and a constitutively active form of MRTF-A (MRTF-A- $\Delta$ N), which lacks the RPEL motifs that mediate binding to actin monomers [22,46], resulted in increased expression of  $\alpha$ SMA in control and TGF $\beta$ 1 treated cells cultured on both small and large islands (Figure 6D). Expression of a dominant negative form of MRTF-A (MRTF-A- $\Delta$ C), which lacks the transcriptional activation domain [37], did not promote the expression of  $\alpha$ SMA (Figure 6D). Similar results were observed for the expression of caldesmon and tropomyosin (Figure S4). These data further support a role for MRTF-A signaling in the regulation of TGF $\beta$ 1-induced expression of cytoskeletal proteins by cell adhesion and cell shape.

## Discussion

In this study, we found that cell morphology regulates TGF $\beta$ 1-induced expression of cytoskeletal genes during the development of myofibroblasts from epithelial cells. Culture of epithelial cells in shapes that promoted increased actin filament assembly and cellular contractility led to the induction of a myogenic program by TGF $\beta$ 1. In contrast, cell shapes that

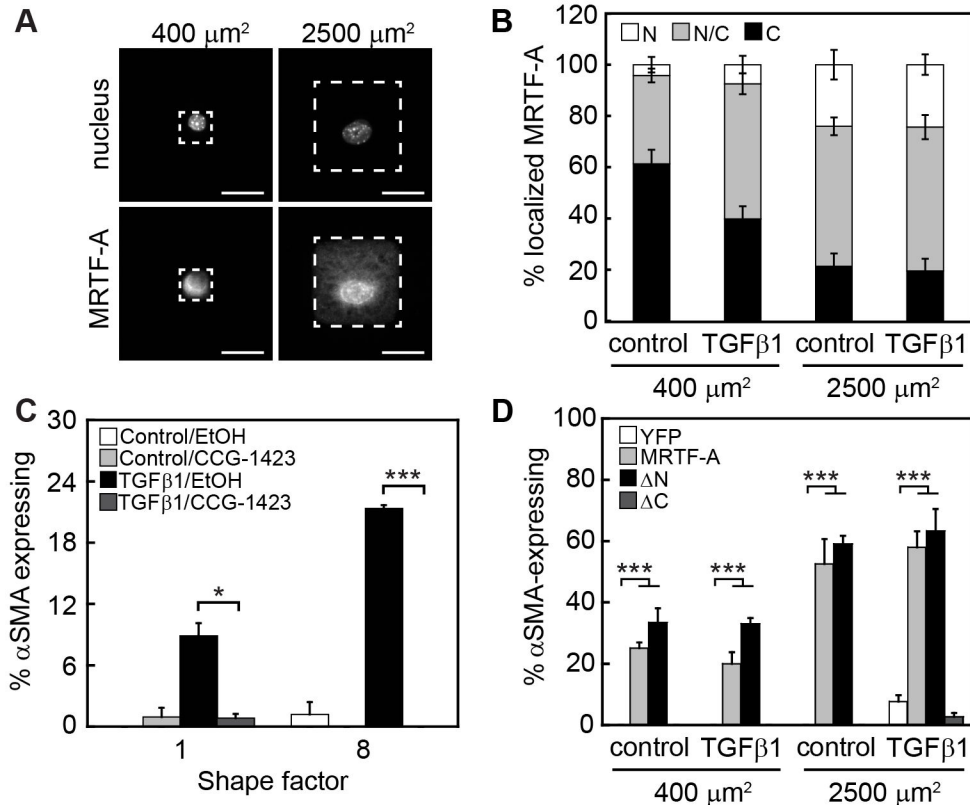

**Figure 6. Myocardin-related transcription factor signaling controls cell shape-dependent induction of  $\alpha$ SMA by TGF $\beta$ 1.** (A) Immunofluorescence staining for nuclei and MRTF-A in TGF $\beta$ 1-treated NMuMG cells cultured on 400  $\mu\text{m}^2$  and 2500  $\mu\text{m}^2$  squares. (B) Quantification of the percentage of cells with nuclear (N), pan-cellular (N/C), and cytoplasmic (C) MRTF-A as a function of cell spread area. (C) Quantification of the percentage of cells expressing  $\alpha$ SMA after simultaneous treatment with TGF $\beta$ 1 and ethanol vehicle or CCG-1423. \* $p < 0.01$ ; \*\*\* $p < 0.001$  compared to ethanol control. Overexpression of Flag-tagged MRTF-A and Flag-tagged MRTF-A- $\Delta$ N increase the expression of  $\alpha$ SMA. (D) Quantification of the percentage of cells expressing  $\alpha$ SMA for YFP, MRTF-A, MRTF-A- $\Delta$ C, and MRTF-A- $\Delta$ N transfected NMuMG cells treated with TGF $\beta$ 1 or control vehicle. \*\*\* $p < 0.001$  compared to YFP. Scale bars: 25  $\mu\text{m}$ .

doi: 10.1371/journal.pone.0083188.g006

prevented actin polymerization blocked TGF $\beta$ 1-mediated upregulation of myofibroblast markers. Our findings suggest a model whereby cell adhesion and shape modulate the relative levels of monomeric and filamentous actin within the cell thereby controlling the nuclear localization of MRTF-A, as shown in Figure 7. Once in the nucleus, MRTF-A cooperates with other TGF $\beta$ 1-induced signaling cascades to regulate the expression of cytoskeletal associated proteins.

Changes in cell morphology have previously been reported to control a variety of cell behaviors including cell division [51], proliferation and apoptosis [52], migration [53], and differentiation [32,40,54,55]. Our results show that culture of epithelial cells on small islands blocks TGF $\beta$ 1-induced increases in the expression of  $\alpha$ SMA while culture on large islands that permit cell spreading promotes the myofibroblast phenotype. Decreasing cytoskeletal tension in cells that were permitted to spread blocked the upregulation of  $\alpha$ SMA by TGF $\beta$ 1. These results are consistent with previous studies that have demonstrated a role for RhoA/ROCK signaling and

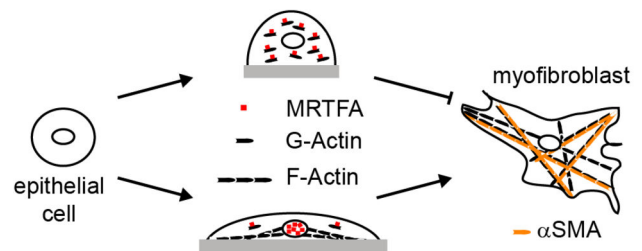

**Figure 7. Model proposing how cell shape, MRTF-A, and TGF $\beta$ 1 signaling regulate the development of myofibroblasts from epithelial cells.**

doi: 10.1371/journal.pone.0083188.g007

cytoskeletal tension in the induction of  $\alpha$ SMA expression and EMT and in the control of myofibroblast properties [34,42]. Given the roles of cell shape and Rho/ROCK signaling in regulating a variety of other cell behaviors including cell cycle

progression [56] and the differentiation of mesenchymal stem cells [40,54], it will be interesting to determine whether SRF/MRTF-A signaling acts in concert with cell shape to control these cell processes.

In addition to changes in cell spread area, cell elongation is also known to modulate cell fate and function including stem cell differentiation[32], macrophage phenotype[57], and contractile force[58]. We find that increased cell elongation for a fixed cell spread area promotes increased expression of  $\alpha$ SMA and cytoskeletal associated proteins in TGF $\beta$ 1 treated cells. Previous studies have demonstrated that cell elongation induces stress fiber alignment in endothelial cells[59] and correlates with increased focal adhesion size and increased traction forces in fibroblasts[60]. Activation of focal adhesion kinase (FAK), a component of focal adhesions, is required for TGF $\beta$ 1-induced EMT[61]. Furthermore, FAK cooperates with gelsolin to mediate force-induced nuclear localization of MRTF-A and  $\alpha$ SMA expression in fibroblasts[29]. Thus, it is possible that cell elongation promotes increased expression levels of  $\alpha$ SMA in TGF $\beta$ 1 treated epithelial cells through increased nuclear localization of MRTF-A or increased focal adhesion signaling.

Loss of cell-cell contacts is an early event that occurs during EMT. Previous studies have proposed a two-hit model whereby disruption of intercellular contacts in combination with TGF $\beta$  enhances MRTF-A signaling and myofibroblast marker expression by promoting prolonged nuclear localization of MRTF-A [8,62]. Our results suggest that a lack of cell-cell contact is not sufficient to induce a myogenic program in epithelial cells in the presence of TGF $\beta$ 1. We find that in addition to these factors, cell adhesion and cell shape control the development of myofibroblasts from epithelial cells.

Recent studies have demonstrated a link between cell adhesion and SRF signaling, with increased cell spreading enhancing SRF promoter activity [48,63]. Our findings are consistent with these results, as we show that MRTF-A nuclear localization and the expression levels of SRF/MRTF-A target genes are enhanced by cell spreading. However, our observation that significant increases in the expression of  $\alpha$ SMA are not observed in control cells that are permitted to spread (even though MRTF-A localizes to the nucleus in a fraction of these cells) suggests that other factors are involved in regulating the transcriptional activity of MRTFs in the context of TGF $\beta$ 1-induced EMT. Our data suggest that translocation of MRTF-A to the cell nucleus in spread epithelial cells is necessary but not sufficient to induce the expression of all SRF/MRTF target genes. In light of this, we posit that increases in cell adhesion and spreading predispose epithelial cells to enhanced MRTF transcriptional activity by promoting increases in cytosolic actin polymerization which then drives MRTF to the cell nucleus. Once in the nucleus, the activity of MRTF may be determined by a variety of factors including the relative levels of negative regulators such as intranuclear G-actin [64] or Smad3 [8]. Indeed, activation of nuclear mDia can induce polymerization of nuclear actin and SRF activity [65]. Recent studies have also shown that the level of Smad3, a protein which binds to MRTFs [26] and subsequently inhibits the transcriptional activity of MRTFs [8], is reduced in epithelial

cells following treatment with TGF $\beta$ 1 [8,62]. Further studies are necessary to identify the key signaling factors involved in regulating the cell shape-dependent transcriptional activity of MRTF-A during TGF $\beta$ 1-induced EMT.

Although our results suggest an important role for MRTF-A signaling in the regulation of TGF $\beta$ 1-induced gene expression by cell shape, we cannot entirely dismiss the possibility that other factors may also contribute to cell shape effects on TGF $\beta$ 1 mediated development of myofibroblasts from epithelial cells. For example, it is possible that cell shape may impact the transcription and translation of EMT associated genes. Cell shape regulates nuclear morphology[59,63,66] and cell rounding leads to histone deacetylation in mammary epithelial cells[67] while cell elongation promotes histone acetylation in mesenchymal stem cells[68]. Additionally, the subcellular localization of mRNAs can regulate gene expression[69,70]. Interestingly, mRNAs have been observed to associate with actin filaments and it has been suggested that this may facilitate translation[71–73]. Thus, it is possible that differences in the cytoskeletal architecture within rounded and spread cells may lead to differences in mRNA transport and translation. A recent study demonstrated that mammary epithelial cells express high levels of cytokeratins when cultured on both small and large ECM islands and TGF $\beta$ 1 treatment induces downregulation of cytokeratins and upregulation of vimentin across a range of cell spread areas[17]. Therefore, although cell shape may affect the transcriptional and translational activity of some genes, these results suggest that restricting cell spreading does not globally downregulate the expression of all proteins associated with EMT.

Overall, our findings demonstrate that the combined effects of cell shape and TGF $\beta$ 1 signaling are critical for MRTF activity and increased expression of myofibroblast markers during EMT. In vivo, EMT occurs during normal morphogenic processes of the embryo and contributes to pathological conditions including fibrosis and cancer. Whether cell shape and MRTF signaling regulate aspects of EMT in all of these biological settings is yet to be determined. Analysis of the precise interplay between cell adhesion and MRTF signaling will permit a clearer view of how biochemical cues and mechanical forces act in concert to influence gene expression.

## Supporting Information

**Figure S1. TGF $\beta$ 1 induces downregulation of epithelial markers and upregulation of mesenchymal markers in NMuMG cells.** (A) Densitometric analysis of western blots from Figure 2. (B) Transcript levels for EMT markers and cytoskeletal associated proteins determined by quantitative real-time PCR. \* $p < 0.05$ , \*\* $p < 0.01$ , \*\*\* $p < 0.001$ . (TIF)

**Figure S2. Cell shape regulates TGF $\beta$ 1-induced expression of caldesmon and tropomyosin.** (A) Immunofluorescence staining for caldesmon and tropomyosin for TGF $\beta$ 1-treated NMuMG cells on islands with shape factors 1 and 8. Relative levels of (B) caldesmon and (C) tropomyosin



for cells cultured with and without TGF $\beta$ 1 in comparison to shape factor 1 control. \* $p < 0.001$ . Scale bars, 20  $\mu\text{m}$ . (TIF)

**Figure S3. TGF $\beta$ 1-induced Smad signaling in NMuMG cells as a function of cell spread area.** Immunostaining for pSmad3 and nuclei for NMuMG cells treated with TGF $\beta$ 1 or control vehicle. Scale bar, 25  $\mu\text{m}$ . (TIF)

**Figure S4. Myocardin-related transcription factor signaling controls cell shape-dependent expression of caldesmon and tropomyosin by TGF $\beta$ 1.** Quantification of the relative levels of (A) caldesmon and (B) tropomyosin after simultaneous treatment with TGF $\beta$ 1 and ethanol vehicle or CCG-1423. Relative levels are computed in comparison to shape factor 1 control. \* $p < 0.05$ , \*\*\* $p < 0.001$ . Overexpression of Flag-tagged MRTF-A and Flag-tagged MRTF-A- $\Delta\text{N}$  increase the expression of caldesmon and tropomyosin. Quantification of the relative levels of (C) caldesmon and (D) tropomyosin for YFP, MRTF-A, MRTF-A- $\Delta\text{C}$ , and MRTF-A- $\Delta\text{N}$  transfected NMuMG cells treated with TGF $\beta$ 1 or control vehicle. Relative

levels are computed in comparison to 900  $\mu\text{m}^2$  control. \*\*\* $p < 0.001$  compared to YFP. (TIF)

## Acknowledgements

We thank Wayne Curtis for use of the FluorChem FC2 system for imaging western blots. We thank Deborah Grove at the Genomics Core Facility of the Huck Institutes of the Life Sciences at Penn State for technical assistance with real-time PCR. Confocal microscopy was performed at the Penn State Microscopy and Cytometry Facility. The authors acknowledge that the Pennsylvania State University Materials Research Institute Nanofabrication Lab is supported by the National Science Foundation under Cooperative Agreement No. ECS-0335765.

## Author Contributions

Conceived and designed the experiments: JWO EWG. Performed the experiments: JWO. Analyzed the data: JWO EWG. Wrote the manuscript: JWO EWG.

## References

- Gabbiani G (1981) The myofibroblast: a key cell for wound healing and fibrocontractive diseases. *Prog Clin Biol Res* 54: 183-194. PubMed: 7015359.
- Hinz B (2007) Formation and function of the myofibroblast during tissue repair. *J Invest Dermatol* 127: 526-537. doi:10.1038/sj.jid.5700613. PubMed: 17299435.
- Hinz B, Phan SH, Thannickal VJ, Galli A, Bochaton-Piallat ML et al. (2007) The myofibroblast: one function, multiple origins. *Am J Pathol* 170: 1807-1816. doi:10.2353/ajpath.2007.070112. PubMed: 17525249.
- Tomasek JJ, Gabbiani G, Hinz B, Chaponnier C, Brown RA (2002) Myofibroblasts and mechano-regulation of connective tissue remodelling. *Nat Rev Mol Cell Biol* 3: 349-363. doi:10.1038/nrm809. PubMed: 11988769.
- Hinz B, Dugina V, Ballestrem C, Wehrle-Haller B, Chaponnier C (2003) Alpha-smooth muscle actin is crucial for focal adhesion maturation in myofibroblasts. *Mol Biol Cell* 14: 2508-2519. doi:10.1091/mbc.E02-11-0729. PubMed: 12808047.
- Gabbiani G, Ryan GB, Majne G (1971) Presence of modified fibroblasts in granulation tissue and their possible role in wound contraction. *Experientia* 27: 549-550. doi:10.1007/BF02147594. PubMed: 5132594.
- Kalluri R, Weinberg RA (2009) The basics of epithelial-mesenchymal transition. *J Clin Invest* 119: 1420-1428. doi:10.1172/JCI39104. PubMed: 19487818.
- Masszi A, Speight P, Charbonney E, Lodyga M, Nakano H et al. (2010) Fate-determining mechanisms in epithelial-myofibroblast transition: major inhibitory role for Smad3. *J Cell Biol* 188: 383-399. doi:10.1083/jcb.200906155. PubMed: 20123992.
- Brown AC, Fiore VF, Sulchek TA, Barker TH (2013) Physical and chemical microenvironmental cues orthogonally control the degree and duration of fibrosis-associated epithelial-to-mesenchymal transitions. *J Pathol* 229: 25-35. doi:10.1002/path.4114. PubMed: 23018598.
- Kim KK, Wei Y, Szekeres C, Kugler MC, Wolters PJ et al. (2009) Epithelial cell alpha3beta1 integrin links beta-catenin and Smad signaling to promote myofibroblast formation and pulmonary fibrosis. *J Clin Invest* 119: 213-224. PubMed: 19104148.
- Shintani Y, Maeda M, Chaika N, Johnson KR, Wheelock MJ (2008) Collagen I promotes epithelial-to-mesenchymal transition in lung cancer cells via transforming growth factor-beta signaling. *Am J Respir Cell Mol Biol* 38: 95-104. doi:10.1165/rcmb.2007-0071OC. PubMed: 17673689.
- Espinosa Neira R, Salazar EP (2012) Native type IV collagen induces an epithelial to mesenchymal transition-like process in mammary epithelial cells MCF10A. *Int J Biochem Cell Biol* 44: 2194-2203. doi:10.1016/j.biocel.2012.08.018. PubMed: 22981734.
- Ben-Ze'ev A (1984) Differential control of cytokeratins and vimentin synthesis by cell-cell contact and cell spreading in cultured epithelial cells. *J Cell Biol* 99: 1424-1433. doi:10.1083/jcb.99.4.1424. PubMed: 6207182.
- Maeda M, Shintani Y, Wheelock MJ, Johnson KR (2006) Src activation is not necessary for transforming growth factor (TGF)-beta-mediated epithelial to mesenchymal transitions (EMT) in mammary epithelial cells. PP1 directly inhibits TGF-beta receptors I and II. *J Biol Chem* 281: 59-68. doi:10.1074/jbc.M503304200. PubMed: 16267045.
- Engler A, Bacakova L, Newman C, Hategan A, Griffin M et al. (2004) Substrate compliance versus ligand density in cell on gel responses. *Biophys J* 86: 617-628. doi:10.1016/S0006-3495(04)74140-5. PubMed: 14695306.
- Leight JL, Wozniak MA, Chen S, Lynch ML, Chen CS (2012) Matrix rigidity regulates a switch between TGF-beta1-induced apoptosis and epithelial-mesenchymal transition. *Mol Biol Cell* 23: 781-791. doi:10.1091/mbc.E11-06-0537. PubMed: 22238361.
- Nelson CM, Khauv D, Bissell MJ, Radisky DC (2008) Change in cell shape is required for matrix metalloproteinase-induced epithelial-mesenchymal transition of mammary epithelial cells. *J Cell Biochem* 105: 25-33. doi:10.1002/jcb.21821. PubMed: 18506791.
- Asparuhova MB, Gelman L, Chiquet M (2009) Role of the actin cytoskeleton in tuning cellular responses to external mechanical stress. *Scand J Med Sci Sports* 19: 490-499. doi:10.1111/j.1600-0838.2009.00928.x. PubMed: 19422655.
- Pipes GC, Creemers EE, Olson EN (2006) The myocardin family of transcriptional coactivators: versatile regulators of cell growth, migration, and myogenesis. *Genes Dev* 20: 1545-1556. doi:10.1101/gad.1428006. PubMed: 16778073.
- Posern G, Treisman R (2006) Actin' together: serum response factor, its cofactors and the link to signal transduction. *Trends Cell Biol* 16: 588-596. doi:10.1016/j.tcb.2006.09.008. PubMed: 17035020.
- Elberg G, Chen L, Elberg D, Chan MD, Logan CJ et al. (2008) MKL1 mediates TGF-beta1-induced alpha-smooth muscle actin expression in human renal epithelial cells. *Am J Physiol Renal Physiol* 294: F1116-F1128. doi:10.1152/ajprenal.00142.2007. PubMed: 18337547.
- Busche S, Descot A, Julien S, Genth H, Posern G (2008) Epithelial cell-cell contacts regulate SRF-mediated transcription via Rac-actin-MAL signalling. *J Cell Sci* 121: 1025-1035. doi:10.1242/jcs.014456. PubMed: 18334560.
- Fan L, Sebe A, Péterfi Z, Masszi A, Thirone AC et al. (2007) Cell contact-dependent regulation of epithelial-myofibroblast transition via the rho-rho kinase-phospho-myosin pathway. *Mol Biol Cell* 18: 1083-1097. doi:10.1091/mbc.E06-07-0602. PubMed: 17215519.

24. Gomez EW, Chen QK, Gjorevski N, Nelson CM (2010) Tissue geometry patterns epithelial-mesenchymal transition via intercellular mechanotransduction. *J Cell Biochem* 110: 44-51. PubMed: 20336666.
25. Masszi A, Fan L, Rosivall L, McCulloch CA, Rotstein OD et al. (2004) Integrity of cell-cell contacts is a critical regulator of TGF-beta 1-induced epithelial-to-myofibroblast transition: role for beta-catenin. *Am J Pathol* 165: 1955-1967. doi:10.1016/S0002-9440(10)63247-6. PubMed: 15579439.
26. Morita T, Mayanagi T, Sobue K (2007) Dual roles of myocardin-related transcription factors in epithelial mesenchymal transition via slug induction and actin remodeling. *J Cell Biol* 179: 1027-1042. doi: 10.1083/jcb.200708174. PubMed: 18056415.
27. Medjkane S, Perez-Sanchez C, Gaggioli C, Sahai E, Treisman R (2009) Myocardin-related transcription factors and SRF are required for cytoskeletal dynamics and experimental metastasis. *Nat Cell Biol* 11: 257-268. doi:10.1038/ncb1833. PubMed: 19198601.
28. Small EM, Thatcher JE, Sutherland LB, Kinoshita H, Gerard RD et al. (2010) Myocardin-related transcription factor-a controls myofibroblast activation and fibrosis in response to myocardial infarction. *Circ Res* 107: 294-304. doi:10.1161/CIRCRESAHA.110.223172. PubMed: 20558820.
29. Chan MW, Arora PD, Bozavikov P, McCulloch CA (2009) FAK, PIP5Klgamma and gelsolin cooperatively mediate force-induced expression of alpha-smooth muscle actin. *J Cell Sci* 122: 2769-2781. doi:10.1242/jcs.044008. PubMed: 19596799.
30. Zhao XH, Laschinger C, Arora P, Szász K, Kapus A et al. (2007) Force activates smooth muscle alpha-actin promoter activity through the Rho signaling pathway. *J Cell Sci* 120: 1801-1809. doi:10.1242/jcs.001586. PubMed: 17456553.
31. Chan MW, Chaudary F, Lee W, Copeland JW, McCulloch CA (2010) Force-induced myofibroblast differentiation through collagen receptors is dependent on mammalian diaphanous (mDia). *J Biol Chem* 285: 9273-9281. doi:10.1074/jbc.M109.075218. PubMed: 20071339.
32. Connelly JT, Gautrot JE, Trappmann B, Tan DW, Donati G et al. (2010) Actin and serum response factor transduce physical cues from the microenvironment to regulate epidermal stem cell fate decisions. *Nat Cell Biol* 12: 711-718. doi:10.1038/ncb2074. PubMed: 20581838.
33. Hinz B (2010) The myofibroblast: paradigm for a mechanically active cell. *J Biomech* 43: 146-155. doi:10.1016/j.jbiomech.2009.09.020. PubMed: 19800625.
34. Hinz B, Mastrangelo D, Iselin CE, Chaponnier C, Gabbiani G (2001) Mechanical tension controls granulation tissue contractile activity and myofibroblast differentiation. *Am J Pathol* 159: 1009-1020. doi:10.1016/S0002-9440(10)61776-2. PubMed: 11549593.
35. Gomez EW, Nelson CM (2011) Lithographically defined two- and three-dimensional tissue microarrays. *Methods Mol Biol* 671: 107-116. PubMed: 20967625.
36. Desai RA, Khan MK, Gopal SB, Chen CS (2011) Subcellular spatial segregation of integrin subtypes by patterned multicomponent surfaces. *Integr Biol (Camb)* 3: 560-567. doi:10.1039/c0ib00129e. PubMed: 21298148.
37. Cen B, Selvaraj A, Burgess RC, Hitzler JK, Ma Z et al. (2003) Megakaryoblastic leukemia 1, a potent transcriptional coactivator for serum response factor (SRF), is required for serum induction of SRF target genes. *Mol Cell Biol* 23: 6597-6608. doi:10.1128/MCB.23.18.6597-6608.2003. PubMed: 12944485.
38. Lin JJ, Li Y, Eppinga RD, Wang Q, Jin JP (2009) Chapter 1: roles of caldesmon in cell motility and actin cytoskeleton remodeling. *Int Rev Cell Mol Biol* 274: 1-68. PubMed: 19349035.
39. Goffin JM, Pittet P, Csucs G, Lussi JW, Meister JJ et al. (2006) Focal adhesion size controls tension-dependent recruitment of alpha-smooth muscle actin to stress fibers. *J Cell Biol* 172: 259-268. doi:10.1083/jcb.200506179. PubMed: 16401722.
40. Kilian KA, Bugarija B, Lahn BT, Mrksich M (2010) Geometric cues for directing the differentiation of mesenchymal stem cells. *Proc Natl Acad Sci U S A* 107: 4872-4877. doi:10.1073/pnas.0903269107. PubMed: 20194780.
41. Shi Y, Massagué J (2003) Mechanisms of TGF-beta signaling from cell membrane to the nucleus. *Cell* 113: 685-700. doi:10.1016/S0092-8674(03)00432-X. PubMed: 12809600.
42. Bhowmick NA, Ghiassi M, Bakin A, Aakre M, Lundquist CA et al. (2001) Transforming growth factor-beta1 mediates epithelial to mesenchymal transdifferentiation through a RhoA-dependent mechanism. *Mol Biol Cell* 12: 27-36. doi:10.1091/mbc.12.1.27. PubMed: 11160820.
43. Barden JA, Miki M, Hambly BD, Dos Remedios CG (1987) Localization of the phalloidin and nucleotide-binding sites on actin. *Eur J Biochem* 162: 583-588. doi:10.1111/j.1432-1033.1987.tb10679.x. PubMed: 3830158.
44. Tan JL, Tien J, Pirone DM, Gray DS, Bhadriraju K et al. (2003) Cells lying on a bed of microneedles: An approach to isolate mechanical force. *Proc Natl Acad Sci U S A* 100: 1484-1489. doi:10.1073/pnas.0235407100. PubMed: 12552122.
45. Wang N, Ostuni E, Whitesides GM, Ingber DE (2002) Micropatterning tractional forces in living cells. *Cell Motil Cytoskeleton* 52: 97-106. doi: 10.1002/cm.10037. PubMed: 12112152.
46. Miralles F, Posern G, Zaromytidou AI, Treisman R (2003) Actin dynamics control SRF activity by regulation of its coactivator MAL. *Cell* 113: 329-342. doi:10.1016/S0092-8674(03)00278-2. PubMed: 12732141.
47. Olson EN, Nordheim A (2010) Linking actin dynamics and gene transcription to drive cellular motile functions. *Nat Rev Mol Cell Biol* 11: 353-365. doi:10.1038/nrm2890. PubMed: 20414257.
48. Wozniak MA, Cheng CQ, Shen CJ, Gao L, Olarerin-George AO et al. (2012) Adhesion regulates MAP kinase/ternary complex factor exchange to control a proliferative transcriptional switch. *Curr Biol* 22: 2017-2026. doi:10.1016/j.cub.2012.08.050. PubMed: 23063436.
49. Hautmann MB, Adam PJ, Owens GK (1999) Similarities and differences in smooth muscle alpha-actin induction by TGF-beta in smooth muscle versus non-smooth muscle cells. *Arterioscler Thromb Vasc Biol* 19: 2049-2058. doi:10.1161/01.ATV.19.9.2049. PubMed: 10479645.
50. Evelyn CR, Wade SM, Wang Q, Wu M, Iñiguez-Lluhí JA et al. (2007) CCG-1423: a small-molecule inhibitor of RhoA transcriptional signaling. *Mol Cancer Ther* 6: 2249-2260. doi:10.1158/1535-7163.MCT-06-0782. PubMed: 17699722.
51. Folkman J, Moscona A (1978) Role of cell shape in growth control. *Nature* 273: 345-349. doi:10.1038/273345a0. PubMed: 661946.
52. Chen CS, Mrksich M, Huang S, Whitesides GM, Ingber DE (1997) Geometric control of cell life and death. *Science* 276: 1425-1428. doi: 10.1126/science.276.5317.1425. PubMed: 9162012.
53. Parker KK, Brock AL, Brangwynne C, Mannix RJ, Wang N et al. (2002) Directional control of lamellipodia extension by constraining cell shape and orienting cell tractional forces. *FASEB J* 16: 1195-1204. doi: 10.1096/fj.02-0038com. PubMed: 12153987.
54. McBeath R, Pirone DM, Nelson CM, Bhadriraju K, Chen CS (2004) Cell shape, cytoskeletal tension, and RhoA regulate stem cell lineage commitment. *Dev Cell* 6: 483-495. doi:10.1016/S1534-5807(04)00075-9. PubMed: 15068789.
55. Watt FM, Jordan PW, O'Neill CH (1988) Cell shape controls terminal differentiation of human epidermal keratinocytes. *Proc Natl Acad Sci U S A* 85: 5576-5580. doi:10.1073/pnas.85.15.5576. PubMed: 2456572.
56. Mammoto A, Huang S, Moore K, Oh P, Ingber DE (2004) Role of RhoA, mDia, and ROCK in cell shape-dependent control of the Skp2-p27kip1 pathway and the G1/S transition. *J Biol Chem* 279: 26323-26330. doi:10.1074/jbc.M402725200. PubMed: 15096506.
57. McWhorter FY, Wang T, Nguyen P, Chung T, Liu WF (2013) Modulation of macrophage phenotype by cell shape. *Proc Natl Acad Sci U S A* 110: 17253-17258. doi:10.1073/pnas.1308887110. PubMed: 24101477.
58. Alford PW, Nesmith AP, Seywerd JN, Grosberg A, Parker KK (2011) Vascular smooth muscle contractility depends on cell shape. *Integr Biol (Camb)* 3: 1063-1070. doi:10.1039/c1ib00061f. PubMed: 21993765.
59. Roca-Cusachs P, Alcaraz J, Sunyer R, Samitier J, Farré R et al. (2008) Micropatterning of single endothelial cell shape reveals a tight coupling between nuclear volume in G1 and proliferation. *Biophys J* 94: 4984-4995. doi:10.1529/biophysj.107.116863. PubMed: 18326659.
60. Rape AD, Guo WH, Wang YL (2011) The regulation of traction force in relation to cell shape and focal adhesions. *Biomaterials* 32: 2043-2051. doi:10.1016/j.biomaterials.2010.11.044. PubMed: 21163521.
61. Cicchini C, Laudadio I, Citarella F, Corazzari M, Steindler C et al. (2008) TGFbeta-induced EMT requires focal adhesion kinase (FAK) signaling. *Exp Cell Res* 314: 143-152. doi:10.1016/j.yexcr.2007.09.005. PubMed: 17949712.
62. Charbonney E, Speight P, Masszi A, Nakano H, Kapus A (2011) beta-catenin and Smad3 regulate the activity and stability of myocardin-related transcription factor during epithelial-myofibroblast transition. *Mol Biol Cell* 22: 4472-4485. doi:10.1091/mbc.E11-04-0335. PubMed: 21965288.
63. Jain N, Iyer KV, Kumar A, Shivashankar GV (2013) Cell geometric constraints induce modular gene-expression patterns via redistribution of HDAC3 regulated by actomyosin contractility. *Proc Natl Acad Sci U S A* 110: 11349-11354. doi:10.1073/pnas.1300801110. PubMed: 23798429.
64. Vartiainen MK, Guettler S, Larjani B, Treisman R (2007) Nuclear actin regulates dynamic subcellular localization and activity of the SRF cofactor MAL. *Science* 316: 1749-1752. doi:10.1126/science.1141084. PubMed: 17588931.

65. Baarlink C, Wang H, Grosse R (2013) Nuclear actin network assembly by formins regulates the SRF coactivator MAL. *Science* 340: 864-867. doi:10.1126/science.1235038. PubMed: 23558171.
66. Versaevel M, Grevesse T, Gabriele S (2012) Spatial coordination between cell and nuclear shape within micropatterned endothelial cells. *Nat Commun* 3: 671. doi:10.1038/ncomms1668. PubMed: 22334074.
67. Le Beyec J, Xu R, Lee SY, Nelson CM, Rizki A et al. (2007) Cell shape regulates global histone acetylation in human mammary epithelial cells. *Exp Cell Res* 313: 3066-3075. doi:10.1016/j.yexcr.2007.04.022. PubMed: 17524393.
68. Li Y, Chu JS, Kurpinski K, Li X, Bautista DM et al. (2011) Biophysical regulation of histone acetylation in mesenchymal stem cells. *Biophys J* 100: 1902-1909. doi:10.1016/j.bpj.2011.03.008. PubMed: 21504726.
69. Xing L, Bassell GJ (2013) mRNA localization: an orchestration of assembly, traffic and synthesis. *Traffic* 14: 2-14. PubMed: 22913533.
70. Martin KC, Ephrussi A (2009) mRNA localization: gene expression in the spatial dimension. *Cell* 136: 719-730. doi:10.1016/j.cell.2009.01.044. PubMed: 19239891.
71. Jung J, Lifland AW, Alonas EJ, Zurla C, Santangelo PJ (2013) Characterization of mRNA-cytoskeleton interactions in situ using FMTRIP and proximity ligation. *PLOS ONE* 8: e74598. doi:10.1371/journal.pone.0074598. PubMed: 24040294.
72. Hesketh JE, Pryme IF (1991) Interaction between mRNA, ribosomes and the cytoskeleton. *Biochem J* 277(Pt 1): 1-10. PubMed: 1854327.
73. Condeelis J, Singer RH (2005) How and why does beta-actin mRNA target? *Biol Cell* 97: 97-110. doi:10.1042/BC20040063. PubMed: 15601261.
